# Supplementary material
Source: publisher figshare collection journal article supplement (https://rs.figshare.com/ndownloader/files/9479008)
Supplement: Supplementary file 1 [file 9479008]

## Sheet: Avian Data
Table S2: List of Mesozoic specimens with specimens used in analyses indicated
Legend
Specimen used in analyses
Measurment taken from image using ImageJ
Specimen used in primary feather regressions
Estimated based on similarly sized specimen
Specimens added to additional analyses including larger and smaller indviduals
	Specimen number		Skull length	Mandible length	Mandible depth	Humerus	Radius/Ulna	Manus (CMC + Ph1D2 + Ph2D2)	Average primary feather	Femur	Tibiotarsus	Tarsometatarsus	Notes	Source
Archaeopteryx_lithographica	WDC CSG 100	Archaeopterygidae	52.9	NA	NA	56.9	50.9	53.4	113	50.3	74.6	39.6		Mayr et al. 2007. The tenth specimen of Archaeopteryx. Zoological Journal of the Linnean Society. 149: 97-116
Archaeorhynchus_spathula	IVPP V14287	Ornithuromorpha	NA	NA	NA	53	56	50	125	37	42	20	Subadult (Vertebrae and extremeties of long bones poorly ossified or unfused)	Wang et al. 2013. Correction: Avian wing proportions and flight styles: First step towards predicted the flight modes of Mesozoic birds. PLoS One; Zhou & Zhang 2006 A beaked basal ornithurine bird (Aves, Ornithurae) from the Lower Cretaceous of China. Zoologica Scripta 35: 363-373
Cathayornis_sp.	STM A11-58	Enantiornithes	-	-	-	21.12	23.25	18.87	37.58					Wang et al. 2013. Correction: Avian wing proportions and flight styles: First step towards predicted the flight modes of Mesozoic birds. PLoS One
Concornis_lacustris	LH2814	Enantiornithes	NA	NA	NA	33.46	34.22	25.58	47.7	24.1	37.09	22.13		Wang et al. 2013. Correction: Avian wing proportions and flight styles: First step towards predicted the flight modes of Mesozoic birds. PLoS One; Sanz et al. 1995 The Osteology of Concornis lacustris (Aves: Enantiomithes) from the Lower Cretaceous of Spain and a reexamination of its phylogenetic relationships. American Museum Notivates 3133: 23pp
Cuspirostrisornis_houi	STM A11-65.	Enantiornithes	-	-	-	26.49	23.36	28.7	38.25					Wang et al. 2013. Correction: Avian wing proportions and flight styles: First step towards predicted the flight modes of Mesozoic birds. PLoS One
Dapingfangornis sentisorhinus	LPM 00039	Enantiornithes	28	21.93	1.64	22	27	22.2	44.4	23	29	16		Wang et al. 2013. Correction: Avian wing proportions and flight styles: First step towards predicted the flight modes of Mesozoic birds. PLoS One; Li et al. 2006. New eoenantiornithind bird from the Early Cretaceous Jiufotang Formation of Western Liaoning, China. Acta Geologica Sinica 80: 38-41.
Eoalulavis_hoaysi	LH13500	Enantiornithes	NA	NA	NA	30	35.1	19	27.3	NA	NA	NA		Wang et al. 2013. Correction: Avian wing proportions and flight styles: First step towards predicted the flight modes of Mesozoic birds. PLoS One
Eoenantiornis_buhleri	IVPP V11537	Enantiornithes	22	NA	NA	29.43	31.17	24.86	66.91	26.5	31	22.3		Wang et al. 2013. Correction: Avian wing proportions and flight styles: First step towards predicted the flight modes of Mesozoic birds. PLoS One; Hou et al. 1999 Archaeopteryx to opposite birds - missing link from the Mesozoic of China. Vertebrata PalAsiatica 37:88-95
Hongshanornis_longicresta	IVPP V14533	Ornithuromorpha	29.77	25.64	1.83	25.96	25.08	20.8	40.74	22	38	22		Wang et al. 2013. Correction: Avian wing proportions and flight styles: First step towards predicted the flight modes of Mesozoic birds. PLoS One; Zhou & Zhang 2005. Discovery of an ornithurine bird and its implication for Early Cretaceous avian radiation. Proceedings of the National Academy of Sciences 102: 18999-19002
Jianchangornis_microdonta	IVPP V16708	Ornithuromorpha	72	58.03	3.96	76.2	82.1	70	109.8	60	76	37		Wang et al. 2013. Correction: Avian wing proportions and flight styles: First step towards predicted the flight modes of Mesozoic birds. PLoS One; Zhou et al. 2009. A new basal ornithurine bird (Jianchanornis microdonta gen. et sp. nov.) from the Lower Cretaceous of China. Vertebrata PalAsiatica 47: 299-310.
Longipteryx_chaoyangensis	STM A8-3	Enantiornithes				28.5	36.77	29.52	82.84					Wang et al. 2013. Correction: Avian wing proportions and flight styles: First step towards predicted the flight modes of Mesozoic birds. PLoS One
Longirostravis_hani	IVPP V11309	Enantiornithes	36	31.4	2.49	23.28	24.81	16.02	62.96	20	25.5	14		Wang et al. 2013. Correction: Avian wing proportions and flight styles: First step towards predicted the flight modes of Mesozoic birds. PLoS One; Hou et al. 2004. New Early Cretaceous fossil from China documents a novel trophic specialization for Mesozoic birds. Naturwissenshaften
Protopteryx_fengningensis	IVPP V11665	Enantiornithes	28.3	19.7	1.75	26.89	26.76	27.4	44.09	~20.8	~32.8	~15.9		Wang et al. 2013. Correction: Avian wing proportions and flight styles: First step towards predicted the flight modes of Mesozoic birds. PLoS One
Paraprotopteryx_gracilisi	STM 1-7	Enantiornithes	21.747	18.015	3.56	18.39	21.45	20	39.38	22.2	26.3	15.7		Wang et al. 2013. Correction: Avian wing proportions and flight styles: First step towards predicted the flight modes of Mesozoic birds. PLoS One; Zheng et al. 2007. A new enantiornithine bird with four long entrices from the Early Cretaceous of Northern Hebei, China. Acta Geologica Sinica 81: 703-708.
Shenweiniao_cooperorum	DNHM D1878	Enantiornithes	32.69	23.1?	NA	22.43	23.36	23.36???	43.2	17.6	22.61	11.9		Wang et al. 2013. Correction: Avian wing proportions and flight styles: First step towards predicted the flight modes of Mesozoic birds. PLoS One; O'Connor et al. 2009. Phylogenetic support for a specialized clade of Cretaceous enantiornithine birds with information from a new species. Journal of Vertebrate Paleontology 29: 188-204
Yixianornis_grabaui	IVPP V12631	Ornithuromorpha	39	NA	NA	>38.84	49.06	52.06	104.05	41	52	26		Wang et al. 2013. Correction: Avian wing proportions and flight styles: First step towards predicted the flight modes of Mesozoic birds. PLoS One; Zhou & Zhang 2001. Two new ornithurine birds from the Early Cretaceous of western Liaoning, China. Chinese Science Bulletin 46: 1258-1264.
Confuciusornis_sp	Wang et al. 2013	Confuciusornithidae				49.32	44.84	55.09	138.79
Alethoalaornis_agitornis	LPM 00009	Enantironithes	27	NA	NA	24	26	23	33.3	24	27	17		Li et al. 2007. Acta Geologica Sinica 46: 365-372.
Ambiortus_dementjevi	PIN 3790/271	Ornithuromorpha	NA	NA	NA	NA	NA	NA		NA	NA	NA		O'Connor & Zelenkov 2013 The phylogeneitc position of Ambiortus: Comparison with other Mesozoic birds from Asia. Paleontological Journal 47: 1270-1281
Apsaravis_ukhaana	IGM 100/1017	Ornithuromorpha	NA	NA	NA	48.4	45.7	NA		40.9	NA	28.7		Clarke & Norell 2002. The morphology and phylogenetic position of Apsaravis ukhaana from the Late Cretaceous of Mongolia. American Museum Notivates 3387: 46pp
Archaeopteryx_lithographica	11th	Archaeopterygidae	NA	NA	NA	65.6	62.5	69.7	118	55.3	78	40.3		Foth et al. 2014. New specimen of Archaeopteryx provides insights into the evolution of pennaceous feathers. Nature 511:79-82
Archaeopteryx_lithographica	Solnhofen	Archaeopterygidae	65	NA	NA	83	72	81.9		67	92	47.5		Wellnhofer 2009. Archaeopteryx: The Icon of Evolution (English Version).
Archaeopteryx_lithographica	HMN 1880	Archaeopterygidae	52	42.3	4.3	63.5	55	62.9	120.8	52.6	68.5	37		Wellnhofer 2009. Archaeopteryx: The Icon of Evolution (English Version).
Archaeopteryx_lithographica	Eichstätt	Archaeopterygidae	41.77	38.86	3.435	41.5	36.5	43.1		37	52.5	30.2		Wellnhofer 2009. Archaeopteryx: The Icon of Evolution (English Version). Haubitz et al. 1988. Computed tomography of Archaeopteryx. Paleobiology 14:206-213.
Archaeopteryx_lithographica	Munich	Archaeopterygidae	45			57.5	53.5	55.5		48	73	40		Wellnhofer 2009. Archaeopteryx: The Icon of Evolution (English Version).
Archaeopteryx_lithographica	London	Archaeopterygidae	62.5			74.6	67.2	NA		61	80.7	44.1		Wellnhofer 2009. Archaeopteryx: The Icon of Evolution (English Version).
Archaeornithura_meemannae	STM 7-145	Ornithuromorpha	NA	NA	NA	25.9	25.8	28.1	88.1	23.8	38	23	Carpometacarpus fused proxiamlly but not distally	Wang et al. 2015. The oldest record of ornithuromorpha from the early cretaceous of China. Nature Communications 6:6987
Archaeornithura_meemannae	STM 7-163	Ornithuromorpha	NA	NA	NA	27.5	28.3	27.6		NA	37.5	-		Wang et al. 2015. The oldest record of ornithuromorpha from the early cretaceous of China. Nature Communications 6:6988
Avisaurus_gloriae	MOR 553E/6.19.91.64	Enantiornithes	NA	NA	NA	NA	NA	NA		NA	NA	30.9		Varraicchio & Chiappe 2010. A new enantiornithine bird from the Upper Cretaceous Two Medicine Formation of Montana. Journal of Vertebrate Paleontology 15:201-204.
Avisaurus_archibaldi	UCMP117600	Enantiornithes	NA	NA	NA	NA	NA	NA		NA	NA	73.9		Varraicchio & Chiappe 2010. A new enantiornithine bird from the Upper Cretaceous Two Medicine Formation of Montana. Journal of Vertebrate Paleontology 15:201-204.
Baptornis_sp.	KUVP 2290	Ornithurae	NA	NA	NA	118	21.6	NA		75	NA	NA		Martin & Tate Jr 1976 The skeleton of Baptornis advenus (Aves:Hesperornithiformes) In Collected papers in avian paleontology honoring the 90th birthday of Alexander Wetmore. Smithsonian Institution Press
Baptornis_sp.	UNSM 20030	Ornithurae	NA	NA	NA	NA	NA	NA		71	195	84		Martin & Tate Jr 1976 The skeleton of Baptornis advenus (Aves:Hesperornithiformes) In Collected papers in avian paleontology honoring the 90th birthday of Alexander Wetmore. Smithsonian Institution Press
Baptornis_sp.	FMNH 395	Ornithurae	NA	NA	NA	NA	NA	NA		72	194	83		Martin & Tate Jr 1976 The skeleton of Baptornis advenus (Aves:Hesperornithiformes) In Collected papers in avian paleontology honoring the 90th birthday of Alexander Wetmore. Smithsonian Institution Press
Bohaiornis_guoi	LPM B00167	Enantiornithes	>38.5			47	48	39.6+semilunate carpal		39	46	22.5		Hu et al. 2011 A new enantiornithine bird from the Lower Cretaceous of western Liaoning, China. Journal of Vertebrate Paleontology 31:154-161.
Bellulia_rectusunguis	IVPP V17970	Ornithuromorpha	NA	NA	NA	69.6	78.2	71.3		53	66	34.9		Wang et al. 2016. A new basal ornithuromorph bird (Aves: Ornithothoraces) from the Early Cretaceous of China with implication for morphology of early Ornithuromorpha. Zoological Journal of the Linnean Society 176: 207–223
Bohaiornis_guoi	IVPP V 17963	Enantiornithes	47.1	38	2.9	51.95	52.5	41.55		42.6	51.25	22.7		Li et al. 2014 A new specimen of large-bodied basal enantiornithine Bohaiornis from the Early Cretaceous of China and the inference of feeding ecology in Mesozoic birds. Journal of Paleontology 88: 99-108
Boluochia_zhengi	IVPP V9770	Enantiornithes	NA	NA		NA	NA	NA		NA	NA	NA		O' Connor et al. 2011. A reappraisal of Boluochia zhengi (Aves: Enantiornithes) and a discussion of intraclade diversity in the Jehol avifauna, China. Journal of Systematic Palaeontology 9: 51-63
Cathayornis_yandica	IVPP V9769	Enantiornithes	28.1	NA	NA	25.7	26.2	23.4		23	29.4	NA		Wang & Liu 2015 Taxonomical reappraisal of Cathayornithidae (Aves: Enantiornithes), Journal of Systematic Palaeontology, DOI: 10.1080/14772019.2014.994087
Changchengornis_hengdaoziensis	GMV 2129	Confuciusornithidae				33.53	31.97	38.45		33.46	36.59	20.64		Qiang et al. 1999. A new late Mesozoic confuciusornithid bird from China. Journal of Vertebrate Paleontology 19:1-7; Chiappe et al. 1999 Anatomy and systematics of the Confuciusornithidae (Theropoda: Aves) from the Late Mesozoic of northeastern China. Bulletin of the American Museum of Natural History 242: 89pp.
Changmaornis_houi	GSGM 08 CM 002	Ornithuromorpha	NA	NA	NA	NA	NA	NA		NA	NA	31.5		Wang et al. 2013 Previously unrecognized ornithuromorph bird diversity in the Early Cretaceous Changma Basin, Gansu Province, Northwestern China. PLoS ONE 8: e77693. doi:10.1371/journal.pone.0077693
Changzuiornis_ahgmi	AGB5840	Ornithuromorpha	73.87	~66.8	3.47	50.4	52	57.4		29.4	54	36.1		Huang et al. 2016. A new ornithurine from the Early Cretaceous of China sheds light on the evolution of early ecological and cranial diversity in birds. PeerJ 4:e1765; DOI 10.7717/peerj.1765
Chiappeavis_magnapremaxillo	STM29-11	Enantiornithes	41.6	35.3	2.9	55.4	63.1	50.3		40	43.2	23.6	Subadult	O'Connor et al. 2016. An enantiornithine with a fan-shaped tail, and the evolution of the rectricial complex in early birds. Current Biology 26: 114–119
Chongmingia_zhengi	STM 9-9	Basal	NA	NA	NA	72.6	77.8	65		61.6	69.4	37.3		Wang, M. et al. 2016. A new basal bird from China with implications for morphological diversity in early birds. Scientific Reports 6:19700; doi: 10.1038/srep19700 .
Confuciusornis_dui	IVPP V11553	Confuciusornithidae	45.5	40	6.78	42	39	>19		35	41	19.5		Hou et al. 1999 Adiapsid skull in a newspecies of the primitive bird Confuciusornis. Nature 399: 679=682
Confuciusornis_feducciai	DMNH D2454	Confuciusornithidae			NA	78.5	75	>32		59	69	33.5		Zhang et al. 2009 Diversification in an Early Cretaceous avian genus: evidence from a new species of Confuciusornis from China. Journal of Ornithology 150:783-790
Confuciusornis_sanctus	IVPP V10895?	Confuciusornithidae	50			51	42	54		33	41	20		Hou 1997 Mesozoic Birds of China. Feng-huang-ku Bird Park, Taiwan, 221 pp
Confuciusornis_sanctus	IVPP V110304	Confuciusornithidae	73	62		61	55	78.5		>43	66	NA		Hou 1997 Mesozoic Birds of China. Feng-huang-ku Bird Park, Taiwan, 221 pp
Confuciusornis_sanctus	GMV 2130	Confuciusornithidae	55.71	50.47	5.089	47.9	40.73	60.31	189.56	41.78	48.7	23.21		Chiappe et al. 1999 Anatomy and systematics of the Confuciusornithidae (Theropoda: Aves) from the Late Mesozoic of northeastern China. Bulletin of the American Museum of Natural History 242: 89pp.
Confuciusornis_sanctus	GMV 2131	Confuciusornithidae				41.86	34.89	54.24		NA	NA	20.52		Chiappe et al. 1999 Anatomy and systematics of the Confuciusornithidae (Theropoda: Aves) from the Late Mesozoic of northeastern China. Bulletin of the American Museum of Natural History 242: 89pp.
Confuciusornis_sanctus	GMV 2132	Confuciusornithidae	74.79	72.03	9.59	69.15	58.45	93.18		58.07	66.05	31.8		Chiappe et al. 1999 Anatomy and systematics of the Confuciusornithidae (Theropoda: Aves) from the Late Mesozoic of northeastern China. Bulletin of the American Museum of Natural History 242: 89pp.
Confuciusornis_sanctus	GMV 2133	Confuciusornithidae				52.58	45.38	NA		46.85	53.29	25.64		Chiappe et al. 1999 Anatomy and systematics of the Confuciusornithidae (Theropoda: Aves) from the Late Mesozoic of northeastern China. Bulletin of the American Museum of Natural History 242: 89pp.
Confuciusornis_suniae	IVPP V11308	Confuciusornithidae	-	-	-	51	46	64		45	55	26		Hou 1997 Mesozoic Birds of China. Feng-huang-ku Bird Park, Taiwan, 221 pp
Cratoavis_cearensis	UFRJ-DG 031 Av	Enantiornithes	NA	NA	NA	14	13.3	10.4		12.8	12	8.9	Juvenile/Subadult?	de Souza Carvalho et al. 2015. A mesozoic bird from Gondwana preserving feathers. Nature Communications 6:7141 doi: 10.1038/ncomms8141. de Souza Carvalho et al. 2015. A new genus and species of enantiornithine bird from the Early Cretaceous of Brazil. Brazilian Journal of Geology, 45: 161-171,
Cuspirostrisornis_houi	IVPP V10896	Enantiornithes	~27			29	32	NA		27.3	32.5	19		Hou 1997 Mesozoic Birds of China. Feng-huang-ku Bird Park, Taiwan, 221 pp
Dalingheornis_liweii	CNU VB 2005001	Enantironithes	20	-	-	14	14	14		11	16	9	Tarsals unfused to the tibia	Zhang et al. 2006. The first Mesozoic heterodactyl bird from China. Acta Geologica Sinica 80:631-635
Didactylornis_jii	CDPC 02 08 001	Sapeornithiformes	82.63	~70.93	NA	132.37	134.95	120.22		78.56	85.778	43.667		Yuan 2008. A new genus and species of Sapeornithidae from Lower Cretaceous in Western Liaoning, China. Acta Geologica Sinica 82: 48-55
Dingavis_longimaxilla	IVPP V20284	Ornithuromorpha	58.6	51.9	3.8	48.9	52	57.6		36.1	55.4	40.6		O'Connor et al. 2016: A new ornithuromorph (Aves) with an elongate rostrum from the Jehol Biota, and the early evolution of rostralization in birds, Journal of Systematic Palaeontology, DOI: 10.1080/14772019.2015.1129518
Dunhuangia_cuii	GSGM-05-CM-030	Enantiornithes	NA	NA	NA	NA	NA	32		NA	NA	NA		Wang et al.. 2015. Second species of enantiornithine bird from the Lower Cretaceous Changma Basin, northwestern China with implications for the taxonomic diversity of the Changma avifauna. Cretaceous Research 55:56-65
Elsornis_keni	MPD b100/201	Enantiornithes	NA	NA	NA	77.3	66.68	>38.3		NA	NA	NA		Chiappe et al. 2007. A new enantiornithine bird from the Late Cretaceous of the Gobi Desert. Journal of Systematic Palaeontology 5: 193-208
Enaliornis_baretti	BMNH A477	Ornithurae	NA	NA	NA	NA	NA	NA		NA	NA	NA		Galton & Martin 2002 Enaliornis, an Early Cretaceous hesperornithiform bird from England pp. 317-338 In Mesozoic Birds: Above the Heads of Dinosaurs. University of California Press, Berkeley.
Enaliornis_sedgwicki	SMC B55314	Ornithurae	NA	NA	NA	NA	NA	NA		NA	NA	NA		Galton & Martin 2002 Enaliornis, an Early Cretaceous hesperornithiform bird from England pp. 317-338 In Mesozoic Birds: Above the Heads of Dinosaurs. University of California Press, Berkeley.
Eocathayornis_walkeri	IVPP V10916	Enantiornithes	NA	NA		23.5	26	25.5		NA	NA	NA		Zhou 2002. A new primative enantiornithine bird from the Early Cretaceous of China. Journal of Vertebrate Paleontology 22: 49-57
Eoconfuciusornis_zhengi		Confuciusornithidae											Juvenile	Zhang et al. 2008. A primitive confuciusornithid bird from China and its implications for early avian flight. Science in China Series D: Earth Sciences 51:625-639
Eopengornis_martini	STM 24-1	Enantiornithes	40.45	31.6	2.4	38	42.4	38.3		27	31	15.9	Subadult	Wang et al. 2014. Insights into the evolution of rachis dominated tail feathers from a new basal enantiornithine (Aves: Ornithothoraces). Biological Journal of the Linnean Society 113:805-819
Fortunguavis_xiaotaizicus	IVPP V18631	Enantiornithes	45.93	34.5	NA	43.6	46.8	39.7		41	49.2	25.6		Wang et al. 2014. A new robust enantiornithine bird from the Lower Cretacous of China with scansorial adaptations. Journal of Vertebrate Paleontology 34:657-671.
Gansus_yumenensis	CAGS IG 04 CM 001	Ornithuromorpha	NA	NA	NA	NA	NA	NA		NA	63.7	36.3		You et al. 2006. A nearly modern amphibous bird from the Early Cretaceous of Northwestern China. Science 312: 1640-1643
Gansus_yumenensis	CAGS IG 04 CM 002	Ornithuromorpha	NA	NA	NA	NA	NA	NA		30	65.8	NA		You et al. 2006. A nearly modern amphibous bird from the Early Cretaceous of Northwestern China. Science 312: 1640-1644
Gansus_yumenensis	CAGS IG 04 CM 003	Ornithuromorpha	NA	NA	NA	48.4	52.8	45.8		31	NA	NA		You et al. 2006. A nearly modern amphibous bird from the Early Cretaceous of Northwestern China. Science 312: 1640-1645
Gansus_yumenensis	CAGS IG 04 CM 004	Ornithuromorpha	NA	NA	NA	48	48.8	42.3		NA	NA	NA		You et al. 2006. A nearly modern amphibous bird from the Early Cretaceous of Northwestern China. Science 312: 1640-1646
Gansus_yumenensis	CAGS IG 04 CM 008	Ornithuromorpha	NA	NA	NA	NA	NA	NA		NA	53.4	31.6		You et al. 2006. A nearly modern amphibous bird from the Early Cretaceous of Northwestern China. Science 312: 1640-1647
Gobipteryx_minuta	Z. Pal. No. MgR-I/12	Enantiornithes	~45	38		NA	NA	NA		NA	NA	NA		Elzanowski. 1974. Preliminary note on the palaeognathous bird from the Upper Cretaceous of Mongolia. Palaeontologia Polonica 29:103-109
Gobipteryx_minuta	PIN 4492-1	Enantiornithes	NA	NA	NA	44	57	NA		36	59.9	25		Kurochkin 1996 A new enantiornithid of the Mongolian Late Cretaceous, and a general appraisal of the infraclass Enantiornithes (Aves). Russian Academy of Sciences Palaeontological Institute Special Issue 1-60
Hesperornis_regalis	YPM 1206	Ornithurae	257	257	25	152	NA	NA		96	NA	132		Marsh 1880 Odontornithes: A monograph on the extinct toothed birds of North America. Report of the Geological Exploration of the Fortieth Parallel, made by order of the Secretary of War according to acts of Congress of March 2, 1867, and March 3, 1869, under the direction of Brig. and Bvt. Major General A. A. Humphreys, Chief of Engineers by Clarence King, U.S. Geologist. Government Printing Offi…
Hesperornis_regalis	YPM 1200	Ornithurae	NA	NA	NA	NA	NA	NA		99	320	136		Marsh 1880 Odontornithes: A monograph on the extinct toothed birds of North America. Report of the Geological Exploration of the Fortieth Parallel, made by order of the Secretary of War according to acts of Congress of March 2, 1867, and March 3, 1869, un
Hesperornis_regalis	YPM 1207	Ornithurae	NA	NA	NA	NA	NA	NA		101	NA	136		Marsh 1880 Odontornithes: A monograph on the extinct toothed birds of North America. Report of the Geological Exploration of the Fortieth Parallel, made by order of the Secretary of War according to acts of Congress of March 2, 1867, and March 3, 1869, un
Hesperornis_regalis	YPM 1476	Ornithurae	NA	NA	NA	NA	NA	NA		105	335	136		Marsh 1880 Odontornithes: A monograph on the extinct toothed birds of North America. Report of the Geological Exploration of the Fortieth Parallel, made by order of the Secretary of War according to acts of Congress of March 2, 1867, and March 3, 1869, un
Hesperornis_regalis	YPM 1477	Ornithurae	NA	NA	NA	NA	NA	NA		97	NA	NA		Marsh 1880 Odontornithes: A monograph on the extinct toothed birds of North America. Report of the Geological Exploration of the Fortieth Parallel, made by order of the Secretary of War according to acts of Congress of March 2, 1867, and March 3, 1869, un
Hesperornis_regalis	YPM 1478	Ornithurae	NA	NA	NA	NA	NA	NA		NA	NA	138		Marsh 1880 Odontornithes: A monograph on the extinct toothed birds of North America. Report of the Geological Exploration of the Fortieth Parallel, made by order of the Secretary of War according to acts of Congress of March 2, 1867, and March 3, 1869, un
Hesperornis_regalis	YPM 1474	Ornithurae	NA	NA	NA	NA	NA	NA		NA	NA	135		Marsh 1880 Odontornithes: A monograph on the extinct toothed birds of North America. Report of the Geological Exploration of the Fortieth Parallel, made by order of the Secretary of War according to acts of Congress of March 2, 1867, and March 3, 1869, un
Hollanda_luceria	MPC-b100/202	Ornithuromorpha	NA	NA	NA	NA	NA	NA		NA	NA	Not recorded		Bell et al. 2010 Description and ecologic analysis of Hollanda luceria, a Late Cretaceous bird from the Gobi Desert (Mongolia). Cretaceous Research 31:16–26
Hollanda_luceria	MPC-b100/203	Ornithuromorpha	NA	NA	NA	NA	NA	NA		NA	NA	NA		Bell et al. 2010 Description and ecologic analysis of Hollanda luceria, a Late Cretaceous bird from the Gobi Desert (Mongolia). Cretaceous Research 31:16–27
Hollanda_luceria	MPC-b100/204	Ornithuromorpha	NA	NA	NA	NA	NA	NA		NA	NA	NA		Bell et al. 2010 Description and ecologic analysis of Hollanda luceria, a Late Cretaceous bird from the Gobi Desert (Mongolia). Cretaceous Research 31:16–28
Hollanda_luceria	MPCb100/205	Ornithuromorpha	NA	NA	NA	NA	NA	NA		NA	NA	NA		Bell et al. 2010 Description and ecologic analysis of Hollanda luceria, a Late Cretaceous bird from the Gobi Desert (Mongolia). Cretaceous Research 31:16–29
Hollanda_luceria	MPCb100/206	Ornithuromorpha	NA	NA	NA	NA	NA	NA		NA	NA	NA		Bell et al. 2010 Description and ecologic analysis of Hollanda luceria, a Late Cretaceous bird from the Gobi Desert (Mongolia). Cretaceous Research 31:16–30
Hollanda_luceria	MPCb100/207	Ornithuromorpha	NA	NA	NA	NA	NA	NA		NA	NA	NA		Bell et al. 2010 Description and ecologic analysis of Hollanda luceria, a Late Cretaceous bird from the Gobi Desert (Mongolia). Cretaceous Research 31:16–31
Hongshanornis_longicresta	DNHM D2495/6	Ornithuromorpha	30.5			24.6	24.5	27.26	64.47	22	35.5	20.6		Chiappe et al. 2014 A new specimen of the Early Cretaceous bird Hongshanornis longicresta: insights into the aerodynamics and diet of a basal ornithuromorph. PeerJ 2:e234; DOI 10.7717/peerj.234
Houornis_caudatus	IVPP V10917	Enantiornithes	26.4	NA	NA	25.5	26.5	23.4		22.9	28.5	15.6		Wang & Liu 2015 Taxonomical reappraisal of Cathayornithidae (Aves: Enantiornithes), Journal of Systematic Palaeontology, DOI: 10.1080/14772019.2014.994087
Houornis_caudatus	IVPP V10533	Enantiornithes	NA	NA	NA	NA	NA	NA		24.5	30.5	16		Hou 1997 Mesozoic Birds of China. Feng-huang-ku Bird Park, Taiwan, 221 pp
Iaceornis_marshi	YPM 1734	Ornithurae	NA	NA	NA	NA	NA	63		NA	NA	NA		Marsh 1880 Odontornithes: A monograph on the extinct toothed birds of North America. Report of the Geological Exploration of the Fortieth Parallel, made by order of the Secretary of War according to acts of Congress of March 2, 1867, and March 3, 1869, un
Iberomesornis_romerali	LH 22	Enantiornithes	NA	NA	NA	17.6	19.2	NA		16.4	20	12		Dyke & Nudds 2009 The fossil record and limb disparity of enantiornithines, the dominant flying birds of the Cretaceous. Lethaia 42: 248–254
Icthyornis_dispar	YPM 1450	Ornithurae	NA	67	8	58	62	NA		30.5	NA	NA		Marsh 1880 Odontornithes: A monograph on the extinct toothed birds of North America. Report of the Geological Exploration of the Fortieth Parallel, made by order of the Secretary of War according to acts of Congress of March 2, 1867, and March 3, 1869, un
Icthyornis_dispar	YPM 1730	Ornithurae	NA	NA	NA	62.5	NA	>31.5		NA	NA	NA		Marsh 1880 Odontornithes: A monograph on the extinct toothed birds of North America. Report of the Geological Exploration of the Fortieth Parallel, made by order of the Secretary of War according to acts of Congress of March 2, 1867, and March 3, 1869, un
Icthyornis_dispar	YPM 1742	Ornithurae	NA	NA	NA	72	NA	>39.5		NA	NA	NA		Marsh 1880 Odontornithes: A monograph on the extinct toothed birds of North America. Report of the Geological Exploration of the Fortieth Parallel, made by order of the Secretary of War according to acts of Congress of March 2, 1867, and March 3, 1869, un
Icthyornis_dispar	YPM 1447	Ornithurae	NA	NA	NA	71.5	NA	NA		NA	NA	NA		Marsh 1880 Odontornithes: A monograph on the extinct toothed birds of North America. Report of the Geological Exploration of the Fortieth Parallel, made by order of the Secretary of War according to acts of Congress of March 2, 1867, and March 3, 1869, un
Icthyornis_dispar	YPM 1453	Ornithurae	NA	NA	NA	NA	75	NA		NA	NA	NA		Marsh 1880 Odontornithes: A monograph on the extinct toothed birds of North America. Report of the Geological Exploration of the Fortieth Parallel, made by order of the Secretary of War according to acts of Congress of March 2, 1867, and March 3, 1869, un
Icthyornis_dispar	YPM 1740	Ornithurae	NA	NA	NA	NA	68.5	NA		NA	NA	NA		Marsh 1880 Odontornithes: A monograph on the extinct toothed birds of North America. Report of the Geological Exploration of the Fortieth Parallel, made by order of the Secretary of War according to acts of Congress of March 2, 1867, and March 3, 1869, un
Icthyornis_dispar	YPM 1723	Ornithurae	NA	NA	NA	NA	NA	NA		NA	57	NA		Marsh 1880 Odontornithes: A monograph on the extinct toothed birds of North America. Report of the Geological Exploration of the Fortieth Parallel, made by order of the Secretary of War according to acts of Congress of March 2, 1867, and March 3, 1869, un
Icthyornis_dispar	YPM 1732	Ornithurae	NA	NA	NA	NA	NA	NA		NA	57	NA		Marsh 1880 Odontornithes: A monograph on the extinct toothed birds of North America. Report of the Geological Exploration of the Fortieth Parallel, made by order of the Secretary of War according to acts of Congress of March 2, 1867, and March 3, 1869, un
Icthyornis_dispar	YPM 1739	Ornithurae	NA	NA	NA	NA	NA	NA		NA	NA	58		Marsh 1880 Odontornithes: A monograph on the extinct toothed birds of North America. Report of the Geological Exploration of the Fortieth Parallel, made by order of the Secretary of War according to acts of Congress of March 2, 1867, and March 3, 1869, un
Iteravis_huchzermeyeri	IVPP V18958	Ornithuromorpha	46	39.1	3	52	53	44.5		35	59	31		Zhou et al. 2014. A new species from an ornithuromorph (Aves: Ornithothoraces) dominated locality of the Jehol Biota. Chinese Science Bulletin 59:5366-5378
Jeholornis_curvipes	YFGP-yb2	Non-pygostylian	75.77	60.6	11.96	102	108	110.065		76	94	48		Lefèrve et al. 2014. A new long-tailed basal bird from the Lower Cretaceous of north-eastern China. Biological Journal of the Linnean Society 113: 790-804.
Jeholornis_prima	IVPP V13274	Non-pygostylian				110	109	94.51		75	88	47		Zhou & Zhang 2002. A long-tailed, seed-eating bird from the Early Cretaceous of China. Nature 418: 405-409
Jibeinia_luanhera		Confuciusornithidae	NA	20	1.7	23.3	24	19		22.2	28	16.3	Vertebral centra unfused	Hou 1997 Mesozoic Birds of China. Feng-huang-ku Bird Park, Taiwan, 221 pp
Largirostrornis_sexdentoris	IVPP V10531	Enantiornithes	32			31	31.5	>15		28.5	33	19		Hou 1997 Mesozoic Birds of China. Feng-huang-ku Bird Park, Taiwan, 221 pp
Lectavis_bretincola	PVL 4021-1	Enantiornithes	NA	NA	NA	NA	NA	NA		NA	156	NA		Chiappe 1993. Enantiornitine (Aves) tarsometatarsi from the Cretaceous Lecho Formation of Northwestern Argentina. American Museum Notivates 3083: 27pp
Liaoningornis_longidigitris	IVPP V11303	Enantiornithes	NA	NA	NA	NA	NA	NA						Hou 1997 A carinate bird from the Upper Jurassic of western .Liaoning, China. Chinese Science Bulletin 42:413-417
Liaoxiornis_delicatus	NIGP 130723	Enantiornithes	24			15	17	~11.4		16	18	11	Juvenile, based on unfused skeletal elements and poor ossification (Chiappe 2007)	Hou & Chen 1999. Liaoxiornis delicatus gen. et sp. nov., the smallest Mesozoic bird. Chinese Science Bulletin 44: 834-838
Linyiornis_amoena	STM 11-80	Enantiornithes	NA	~37	NA	45.2	45.7	37.1		39.7	48.3	21		Wang, Y. 2016. A new Jehol enantiornithine bird with three-dimensional preservation and ovarian follicles, Journal of Vertebrate Paleontology, 36:2, e1054496, DOI: 10.1080/02724634.2015.1054496
Longchengornis_sanyanensis	IVPP V10530	Enantiornithes	NA	NA	NA	32.5	45	>15		21.5	34	21.5		Hou 1997 Mesozoic Birds of China. Feng-huang-ku Bird Park, Taiwan, 221 pp
Longicrusavis_houi	PKUP V1069	Ornithuromorpha	30.7	23.7	1.43	26	25	27.4		24.3	37.6	21		O'Connor et al. 2010. A new ornithuromorph (Aves: Ornithothoraces) bird from the Jehol Group indicative of higher level diversity. Journal of Vertebrate Paleontology 30: 311-321
Longipteryx_chaoyangensis	IVPP V12325	Enantiornithes	55.06	-	-	43.5	44.26	37.6		28.26	30.07	19.2		Wang et al. 2001. Early diversification of birds: Evidence from a new opposite bird. Chinese Science Bulletin 46:945-949; O'Connor et al. 2009. Phylogenetic support for a specialized clade of Cretaceous enantiornithine birds woth information from a new species. Journal of Vertebrate Paleontology 29:188=204.
Longusunguis_kurochkini	IVPP V17964	Enantiornithes	33.9	31.78	2.75	40.3	43.6	34.2		35.8	41.8	22	Subadult	Wang et al. 2014 A new diverse enantiornithine family (Bohaiornithidae fam. nov.) from the Lower Cretaceous of China with information from two new species. Vertebrata PalAsiatica 52: 1-11
Martinavis_cruzyensis	ACAP M1957	Enantiornithes	NA	NA	NA	92	NA	NA		NA	NA	NA		Walker et al. 2007. Large euenantiornithine birds from the Cretaceous of southern France, North America and Argentina. Geological Magazine 144: 977-986
Martinavis_vincei	PVL 4054	Enantiornithes	NA	NA	NA	110	NA	NA		NA	NA	NA		Walker et al. 2007. Large euenantiornithine birds from the Cretaceous of southern France, North America and Argentina. Geological Magazine 144: 977-986
Martinavis_sp.	PVL 4025	Enantiornithes	NA	NA	NA	95.2	NA	NA		NA	NA	NA		Walker et al. 2007. Large euenantiornithine birds from the Cretaceous of southern France, North America and Argentina. Geological Magazine 144: 977-986
Noguerornis_gonzalezi	LP.1702P	Enantiornithes	NA	NA	NA	22.8	24.3	NA		NA	NA	NA		Ruiz 1989 Nuevo genero de ave fosil del Yacimento Neocomiense Del Montsec (Provincia De Lerida España). Estudios geol. 45: 417-425
Neuquenornis_volans	MUCPv 142	Enantiornithes	NA	NA	NA	>64.3	72.1	NA		>56.6	87.7	46.8		Chiappe & Calvo 1994. Neuquenornis volans, a new Late Cretaceous bird (Enantiornithes: Avisauridae) from Patagonia, Argentina. Journal of Vertebrate Paleontology 14: 230-246.
Otogornis_genghisi	IVPP V9706	Enantiornithes	NA	NA	NA	102.4	118.4	>108.2		NA	NA	NA		Dyke & Nudds 2009 The fossil record and limb disparity of enantiornithines, the dominant flying birds of the Cretaceous. Lethaia 42: 248–254; Zhou & Hou 2002 The discovery and study of Mesozoic bird in China pp. 160-183 In Mesozoic Birds: Above the Heads of Dinosaurs. University of California Berkely Press.
Parabohaiornis_martini	IVPP V18691	Enantiornithes	42.5	30.6	2.87	43.4	43.8	34.1		36	40	19.5	Subadult	Wang et al. 2014 A new diverse enantiornithine family (Bohaiornithidae fam. nov.) from the Lower Cretaceous of China with information from two new species. Vertebrata PalAsiatica 52: 1-11
Parabohaiornis_martini	IVPP V18690	Enantiornithes	NA	NA	NA	46.7	NA	NA		37.5	45	22	Subadult	Wang et al. 2014 A new diverse enantiornithine family (Bohaiornithidae fam. nov.) from the Lower Cretaceous of China with information from two new species. Vertebrata PalAsiatica 52: 1-11
Parahongshanornis_chaoyangensis	PMOL-AB00161	Ornithuromorpha	NA	NA	NA	29	27	27.3		24	38	22		Li et al. 2011 A new ornithurine bird (Hongshanornithidae) from the Jiufotang Formation of Chaoyang, Liaoning, China. Vertebrata PalAsiatica 49:195-200
Parapengornis_eurycaudatus	IVPP V18687	Enantiornithes	39.9	NA	NA	52.1	54.9	46.7	144.2	39.8	40.4	20.5		Hu et al. 2015. A New Species of Pengornithidae (Aves: Enantiornithes) from the Lower Cretaceous of China Suggests a Specialized Scansorial Habitat Previously Unknown in Early Birds. PLoS ONE 10(6): e0126791. doi:10.1371/journal.pone.0126791
Parvavis_chuxiongensis	IVPP V18588	Enantiornithes	NA	NA	NA	18.4	18.6	NA		14.5	17.7	9.5		Wang et al. 2014 The first enantiornithine bird from the Upper Cretaceous of China. Journal of Vertebrate Paleontology 34:135-14
Patagopteryx_defarrariisi	MACN N 03	Ornithuromorpha	NA	NA	NA	66.3	NA	NA		~98.8	~137	NA		Chiappe 2002 Osteology of the flightless Patagopteryx deferrariisi the Late Cretaceous of Patagonia (Argentina) pp. 281-316 In Mesozoic Birds: Above the Heads of Dinosaurs. University of California Press, Berkeley.
Patagopteryx_defarrariisi	MACN N 11	Ornithuromorpha	NA	NA	NA	59.8	~51.5	>45.4		~99.1	~136.2	50.8		Chiappe 2002 Osteology of the flightless Patagopteryx deferrariisi the Late Cretaceous of Patagonia (Argentina) pp. 281-316 In Mesozoic Birds: Above the Heads of Dinosaurs. University of California Press, Berkeley.
Patagopteryx_defarrariisi	MUCPv 48	Ornithuromorpha	NA	NA	NA	NA	NA	NA		~97.6	~140	51		Chiappe 2002 Osteology of the flightless Patagopteryx deferrariisi the Late Cretaceous of Patagonia (Argentina) pp. 281-316 In Mesozoic Birds: Above the Heads of Dinosaurs. University of California Press, Berkeley.
Pengornis_houi	IVPP V15336	Enantiornithes	54.7	49.1	3.8	64.3	70.7	43.3		48	50.4	26.5		Zhou et al. 2008. Insight into diversity, body size and morphological evolution from the largest Early Cretaceous enantiornithine bird. Journal of Anatomy 212:565-577.
Pengornis_houi	IVPP V18632	Enantiornithes	39.7	NA	NA	45.7	49	45.1		34.8	37.7	19.7	Lack of fusion and graining of distal ends of long bones	Han et al. 2014. A subadult specimen of Pengornis and character evolution in Enantiornithes. Vertebrata PalAciatica 52:77-97
Piscivoravis_lii	IVPP V17078	Ornithuromorpha	NA	NA	NA	74	77	64		56	71	35	Subadult	Zhou et al. 2014 A new piscivorous ornithuromorph from the Jehol Biota, Historical Biology 26: 608-618
Pterygornis_dapingfangensis	IVPP V20729	Enantiornithes	NA	NA	NA	25.3	28.3	~20.4		23.8	28.6	17		Wang, M. et al. 2015. A new small enantiornithine bird from the Jehol Biota, with implications for early evolution of avian skull morphology, Journal of Systematic Palaeontology, DOI: 10.1080/14772019.2015.1073801
Qiliania_graffini	FRDC-05-CM-006	Enantiornithes	NA	NA	NA	NA	NA	NA		24.3	32.2	20.3		Ji et al. 2011 A new, three-dimensionally preserved enantiornithine bird (Aves: Ornithothoraces) from Gansu Province, north-western China. Zoological Journal of the Linnean Society 162:201–219
Qiliania_graffini	FRDC-04-CM-006	Enantiornithes	NA	NA	NA	NA	NA	NA		NA	32.4	NA		Ji et al. 2011 A new, three-dimensionally preserved enantiornithine bird (Aves: Ornithothoraces) from Gansu Province, north-western China. Zoological Journal of the Linnean Society 162:201–219
Rahonavis_ostromi	University of Antananarivo 8656	Non-pygostylian	NA	NA	NA	NA	132.3	NA		88	119.8	48		Forster et al. 1998. The theropod ancestry of birds: new evidence from the Late Cretaceous of Madagascar. Science 279: 1915-1919
Rapaxavis_pani	DMNH D2522	Enantiornithes	30.1	27.49	1.12	22.8	23.1	19.79		19.1	27.4	13	Lack of fusion of tibiotarsus and carpometacarpus - sub adult	Morschhauser et al. 2009. Anatomy of the Early Cretaceus bird Rapaxavis pani, a new species from Liaoning Province, China. Journal of Vertebrate Paleontology 29: 545-554.
Sapeornis_angustis	IVPP V13396	Sapeornithiformes	54.5	NA	NA	93.9	91.5	86.3		58.2	68.5	30	Subadult	Provini et al. 2009. A new species of the basal bird Sapeornis from the Early Cretaceous of Liaoning, China. Vertebrata PalAsiatica 47: 194-207.
Sapeornis_chaoyangensis	IVPP V12698	Sapeornithiformes	NA			126.5	133.1	119.6		80.4	83.6	44.6		Zhou & Zhang 2003 Anatomy of the primitive bird Sapeornis chaoyangensis from the Early Cretaceous of Liaoning, China. Canadian Journal of Earth Sciences 40: 731-746
Sapeornis_chaoyangensis	IVPP V13275	Sapeornithiformes	62	54.13	7.57	122.6	123.6	111.4		74.4	80.6	41.5		Zhou & Zhang 2003 Anatomy of the primitive bird Sapeornis chaoyangensis from the Early Cretaceous of Liaoning, China. Canadian Journal of Earth Sciences 40: 731-747
Sapeornis_chaoyangensis	IVPP V13276	Sapeornithiformes	64	NA	NA	123.2	124	115.2		72.1	85.3	42		Zhou & Zhang 2003 Anatomy of the primitive bird Sapeornis chaoyangensis from the Early Cretaceous of Liaoning, China. Canadian Journal of Earth Sciences 40: 731-748
Sapeornis_chaoyangensis	DMNH D3078	Sapeornithiformes	54.1	NA	NA	98.5	97.2	86	~151.57	56.7	62.8	32.7	Subadult	Gao et al. 2012 A subadult specimen of the Early Cretaceous bird Sapeornis chaoyangensis and a taxonomic reassessment of sapeornithids. Journal of Vertebrate Paleontology 32:5
Sapeornis_chaoyangensis	DMNH D2523	Sapeornithiformes	NA			133.5	124.2	NA		71	85.7	42.8		Gao et al. 2012 A subadult specimen of the Early Cretaceous bird Sapeornis chaoyangensis and a taxonomic reassessment of sapeornithids. Journal of Vertebrate Paleontology 32:5
Sapeornis_chaoyangensis	DMNH D1197	Sapeornithiformes	61.2			NA	NA	NA		NA	94.6	49		Gao et al. 2012 A subadult specimen of the Early Cretaceous bird Sapeornis chaoyangensis and a taxonomic reassessment of sapeornithids. Journal of Vertebrate Paleontology 32:5
Schizooura_lii	IVPP V16861	Ornithuromorpha	52	44.6	2.6	60	64	58		45	62	36		Zhou et al. 2012. A new basal beaked ornithurine bird from the Lower Cretaceous of Western Liaoning, China. Vertebrata PalAsiatica 50:9-24
Shenqiornis_mengi	DNMH D2950	Enantiornithes	41.9	NA	2.6	43	44.8	45.3		38.8	NA	25		Wang et al. 2010 New species of Enantiornithes (Aves: Ornithothoraces) from the Qiaotou Formation in Northern Hebei, China. Acta Geologica Sinica (English Edition) 84:247-256
Shenshiornis_prima	LPM B00018	Sapeornithiformes	40	40		NA	NA	NA		62	65	32	Subadult	Hu et al. 2010. A new sapeornithid bird from China and its implication for early avian evolution. Acta Geologica Sinica (English Edition) 84: 472-482.
Sinornis_santensis	BPV 538a	Enantiornithes	NA	NA	NA	24	19.2	19.5		~21	26.4	14.6		Sereno et al. 2002 Sinornis santensis (Aves: Enantiornithes) from the Early Cretaceous of Northeastern China; pp. 184–208 in L. M. Chiappe & L. M. Witmer (eds) Mesozoic Birds: Above the Heads of Dinosaurs. University of California Press, Berkeley.
Songlingornis_linghensis	IVPP V10193	Ornithuromorpha	NA	25.5		NA	>28	>25		11	NA	NA		Hou 1997 Mesozoic Birds of China. Feng-huang-ku Bird Park, Taiwan, 221 pp
Soroavisaurus_australis	PVL 4690	Enantiornithes	NA	NA	NA	NA	NA	NA		NA	NA	46.9		Chiappe 1993. Enantiornitine (Aves) tarsometatarsi from the Cretaceous Lecho Formation of Northwestern Argentina. American Museum Notivates 3083: 27pp
Soroavisaurus_australis	PVL 4048	Enantiornithes	NA	NA	NA	NA	NA	NA		NA	NA	51.5		Chiappe 1993. Enantiornitine (Aves) tarsometatarsi from the Cretaceous Lecho Formation of Northwestern Argentina. American Museum Notivates 3083: 27pp
Sulcavis_geeorum	BMNH Ph-000805	Enantiornithes	42.48	32.829	2.18	46.5	51.1	39.19		41.3	47.3	24.85	Metacarpals unfused	O' Connor et al. 2013. A new enantiornithine from the Yixian Formation with the first recognized avian enamel specialization. Journal of Vertebrate Paleontology 33:1, 1-12
Teviornis_gobiensis	PIN 4499-1	Anseriformes	NA	NA		NA	NA	>95.8		NA	NA	NA		Kurochkin et al. 2002. A new presbyornithid bird (Aves, Anseriformes) from the Late Cretaceous of Southern Mongolia. American Museum Notivates 3386: 11pp
Tianyuornis_cheni	STM7-53	Ornithuromorpha	30	18.3	1.8	25.4	26.4	27.1		24.8	39	23.1	subadult	Zheng et al. 2014. New information on Hongshanornithidae (Aves:Ornithuromorpha) from a new subadult specimen. Vertebrata PalAsiatica 52:217-232. Wang et al. 2015. The oldest record of ornithuromorpha from the early cretaceous of China. Nature Communications 6:6987
Vegavis_iaai	MLP 93-I3-1	Anseriformes	NA	NA	NA	124	NA	NA		50	124	78		Clarke 2005. Definitive fossil evidence for the extant avian radiation in the Cretaceous. Nature 433: 305-308.
Vescornis_hebeiensis	NIGP/CAS 130722	Enantiornithes			NA	23.489	25.35	22.117		21.449	28.701	15.299	Sacral vertebrae not fully fused	Zhang et al. 2004 Description of a new enantiornithine bird from the Early Cretaceous of Hebei, northern China. Canadian Journal of Earth Sciences 41: 1097-1107
Vorona_berivotrensis	UA 8651	Ornithuromorpha	NA	NA	NA	NA	NA	NA		NA	NA	60.9		Forster et al. 2002 Vorona berivotrensis, a primative bird from the Late Cretaceous of Madagascar pp. 268-280 In Mesozoic Birds: Above the Heads of Dinosaurs. University of California Press, Berkeley.
Vorona_berivotrensis	FMNH PA 715	Ornithuromorpha	NA	NA	NA	NA	NA	NA		93.7	165.8	NA		Forster et al. 2002 Vorona berivotrensis, a primative bird from the Late Cretaceous of Madagascar pp. 268-280 In Mesozoic Birds: Above the Heads of Dinosaurs. University of California Press, Berkeley.
Vorona_berivotrensis	FMNH PA 717	Ornithuromorpha	NA	NA	NA	NA	NA	NA		94.1	NA	NA		Forster et al. 2002 Vorona berivotrensis, a primative bird from the Late Cretaceous of Madagascar pp. 268-280 In Mesozoic Birds: Above the Heads of Dinosaurs. University of California Press, Berkeley.
Xinghaiornis_lini	XHPM 1121	Ornithothoraces	81	68.1	4.1	75	77.543	67.364		52	72	34		Wang et al. 2013 Xinghaiornis lini (Aves: Ornothothoraces) from the Early Cretaceous of Liaoning: An example of evolutionary mosaic in early birds. Acta Geologica Sinica (English Edition) 87:686-689
Yandangornis_longicaudus	ZMNH M1326	Basal	47		NA	80	60	NA		106	132	70		Cai & Zhao 1999 A long tailed bird from the Late Cretaceous of Zhejiang. Science in China (Series D) 42:434-441
Yanornis_martini	IVPP V12558	Ornithuromorpha	65	60.3	6.88	79	81	68		52	78	38		Zhou & Zhang 2001 Two new ornithurine birds from the Early Cretaceous of western Liaoning, China. Chinese Science Bulletin 46: 1258-1264
Yanornis_sp	STM 9-15	Ornithuromorpha	72.2			80	85	>34		51	78	39		Zheng et al. 2014. New Specimens of Yanornis Indicate a Piscivorous Diet and Modern Alimentary Canal. PLoS One 9:e95036
Yanornis_sp	STM 9-18	Ornithuromorpha	60	55.7	6.4	73	79	~68.3		49	70	31		Zheng et al. 2014. New Specimens of Yanornis Indicate a Piscivorous Diet and Modern Alimentary Canal. PLoS One 9:e95036
Yanornis_sp	STM 9-19	Ornithuromorpha	62		NA	76	80	~63.9		58	73	38		Zheng et al. 2014. New Specimens of Yanornis Indicate a Piscivorous Diet and Modern Alimentary Canal. PLoS One 9:e95036
Yanornis_sp	STM 9-26	Ornithuromorpha	72			78	80	NA		NA	NA	NA		Zheng et al. 2014. New Specimens of Yanornis Indicate a Piscivorous Diet and Modern Alimentary Canal. PLoS One 9:e95036
Yanornis_sp	STM 9-31	Ornithuromorpha	60			NA	NA	NA		NA	NA	52		Zheng et al. 2014. New Specimens of Yanornis Indicate a Piscivorous Diet and Modern Alimentary Canal. PLoS One 9:e95036
Yanornis_sp	STM 9-37	Ornithuromorpha	68	~56.92	NA	79	86	71.95		55	74	NA		Zheng et al. 2014. New Specimens of Yanornis Indicate a Piscivorous Diet and Modern Alimentary Canal. PLoS One 9:e95036
Yanornis_sp	STM 9-46	Ornithuromorpha	68			80	86	>39		57	74	40		Zheng et al. 2014. New Specimens of Yanornis Indicate a Piscivorous Diet and Modern Alimentary Canal. PLoS One 9:e95036
Yanornis_sp	STM 9-49	Ornithuromorpha	61			72	80	NA		50	75	NA		Zheng et al. 2014. New Specimens of Yanornis Indicate a Piscivorous Diet and Modern Alimentary Canal. PLoS One 9:e95036
Yanornis_sp	STM 9-51	Ornithuromorpha	64			67	71	NA		57	75	35		Zheng et al. 2014. New Specimens of Yanornis Indicate a Piscivorous Diet and Modern Alimentary Canal. PLoS One 9:e95036
Yanornis_sp	STM 9-52	Ornithuromorpha	68			68	72	>41		50	68	35		Zheng et al. 2014. New Specimens of Yanornis Indicate a Piscivorous Diet and Modern Alimentary Canal. PLoS One 9:e95036
Yumenornis_huangi	GSGM 06 CM 013	Ornithuromorpha	NA	NA	NA	49.9	52.9	50.6		NA	NA	NA	Subadult (distal ends of metacarpals unfused)	Wang et al. 2013 Previously unrecognized ornithuromorph bird diversity in the Early Cretaceous Changma Basin, Gansu Province, Northwestern China. PLoS ONE 8: e77693. doi:10.1371/journal.pone.0077693
Yungavolucris_brevipedalis	PVL 4040	Enantiornithes	NA	NA	NA	NA	NA	NA		NA	NA	41.6		Chiappe 1993. Enantiornitine (Aves) tarsometatarsi from the Cretaceous Lecho Formation of Northwestern Argentina. American Museum Notivates 3083: 27pp
Yungavolucris_brevipedalis	PVL 4052	Enantiornithes	NA	NA	NA	NA	NA	NA		NA	NA	51.9		Chiappe 1993. Enantiornitine (Aves) tarsometatarsi from the Cretaceous Lecho Formation of Northwestern Argentina. American Museum Notivates 3083: 27pp
Yungavolucris_brevipedalis	PVL 4053	Enantiornithes	NA	NA	NA	NA	NA	NA		NA	NA	41.9		Chiappe 1993. Enantiornitine (Aves) tarsometatarsi from the Cretaceous Lecho Formation of Northwestern Argentina. American Museum Notivates 3083: 27pp
Zhongjianornis_yangi	IVPP V15900	Ornithuromorpha	61	43.6	NA	71	74	71.5		48	71	29		Zhou et al. 2010 A new Lower Cretaceous bird from China and tooth reduction in early avian evolution. Proceedings of the Royal Society B 277: 219-227
Zhouornis_hani	CNUVB-0903	Enantiornithes	>35.98	35.98	2.95	50.6	54	42.5		43.5	51.2	25.8	Subadult	Zhang et al. 2013 A large bird from the Early Cretaceous of China: new information on the skull of enantiornithines. Journal of Vertebrate Paleontology 33:5
